# Supplementary material
Source: publisher figshare collection journal article supplement (https://tandf.figshare.com/articles/dataset/_/9746051)
Supplement: Supplementary file 1 [file 1]

Archive with 2 entries (2 files):
- AppendixTex.tex
- Supplementary Appendix.pdf
